# Supplementary figures and images for: Galectin-3-ITGB1 Signaling Mediates Interleukin 10 Production of Hepatic Conventional Natural Killer Cells in Hepatitis B Virus Transgenic Mice and Correlates with Hepatocellular Carcinoma Progression in Patients
Source: MDPI journal article supplement (doi:10.3390/v16050737), 2024-05-07

Liver

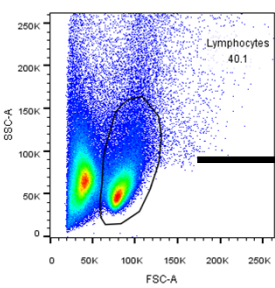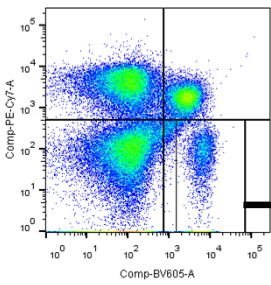

B6

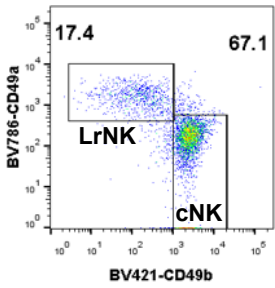

HBs-Tg

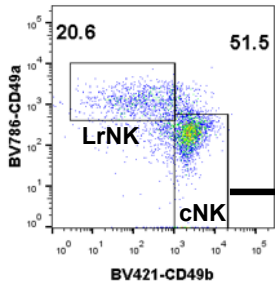

Phenotypes  
& functions

Spleen

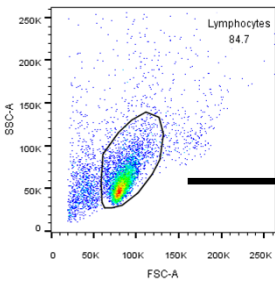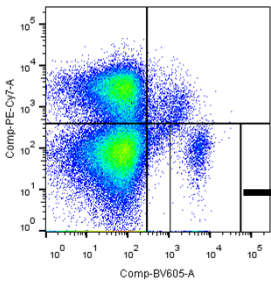

B6

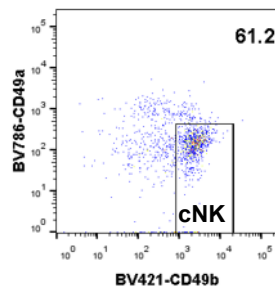

HBs-Tg

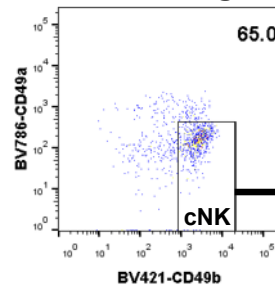

Phenotypes  
& functions

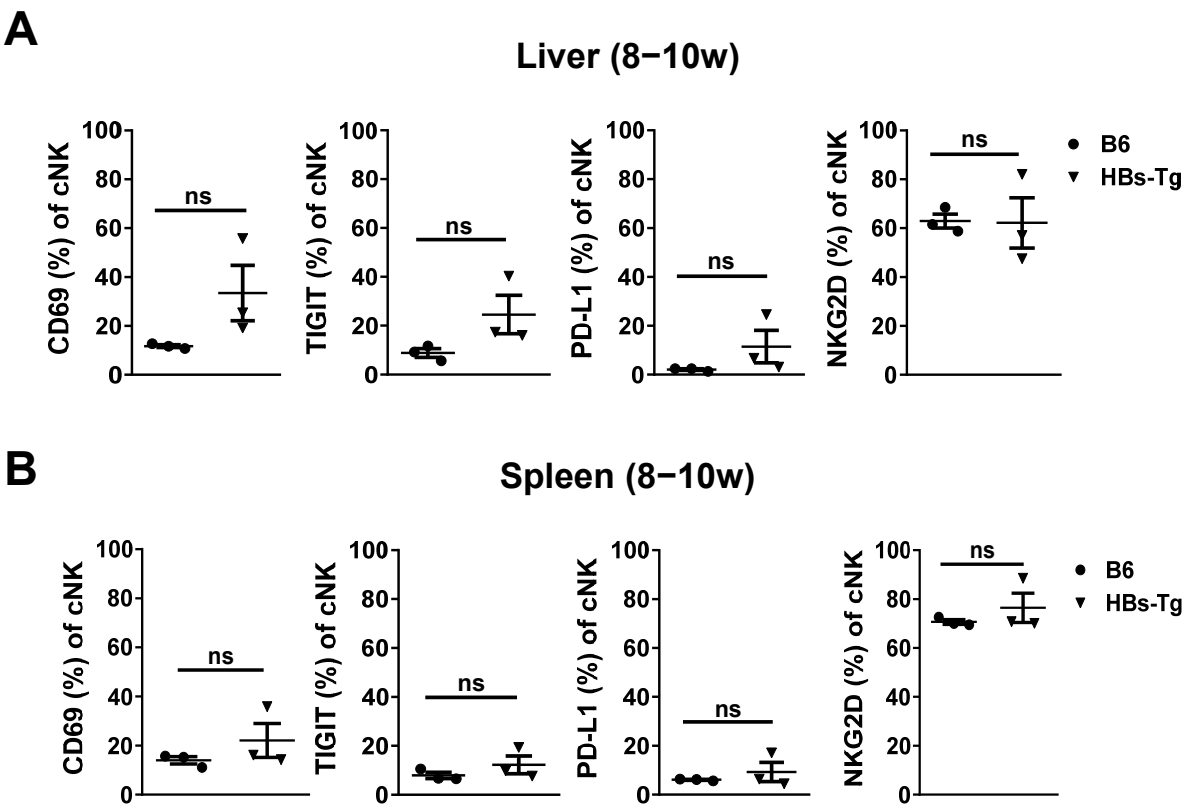

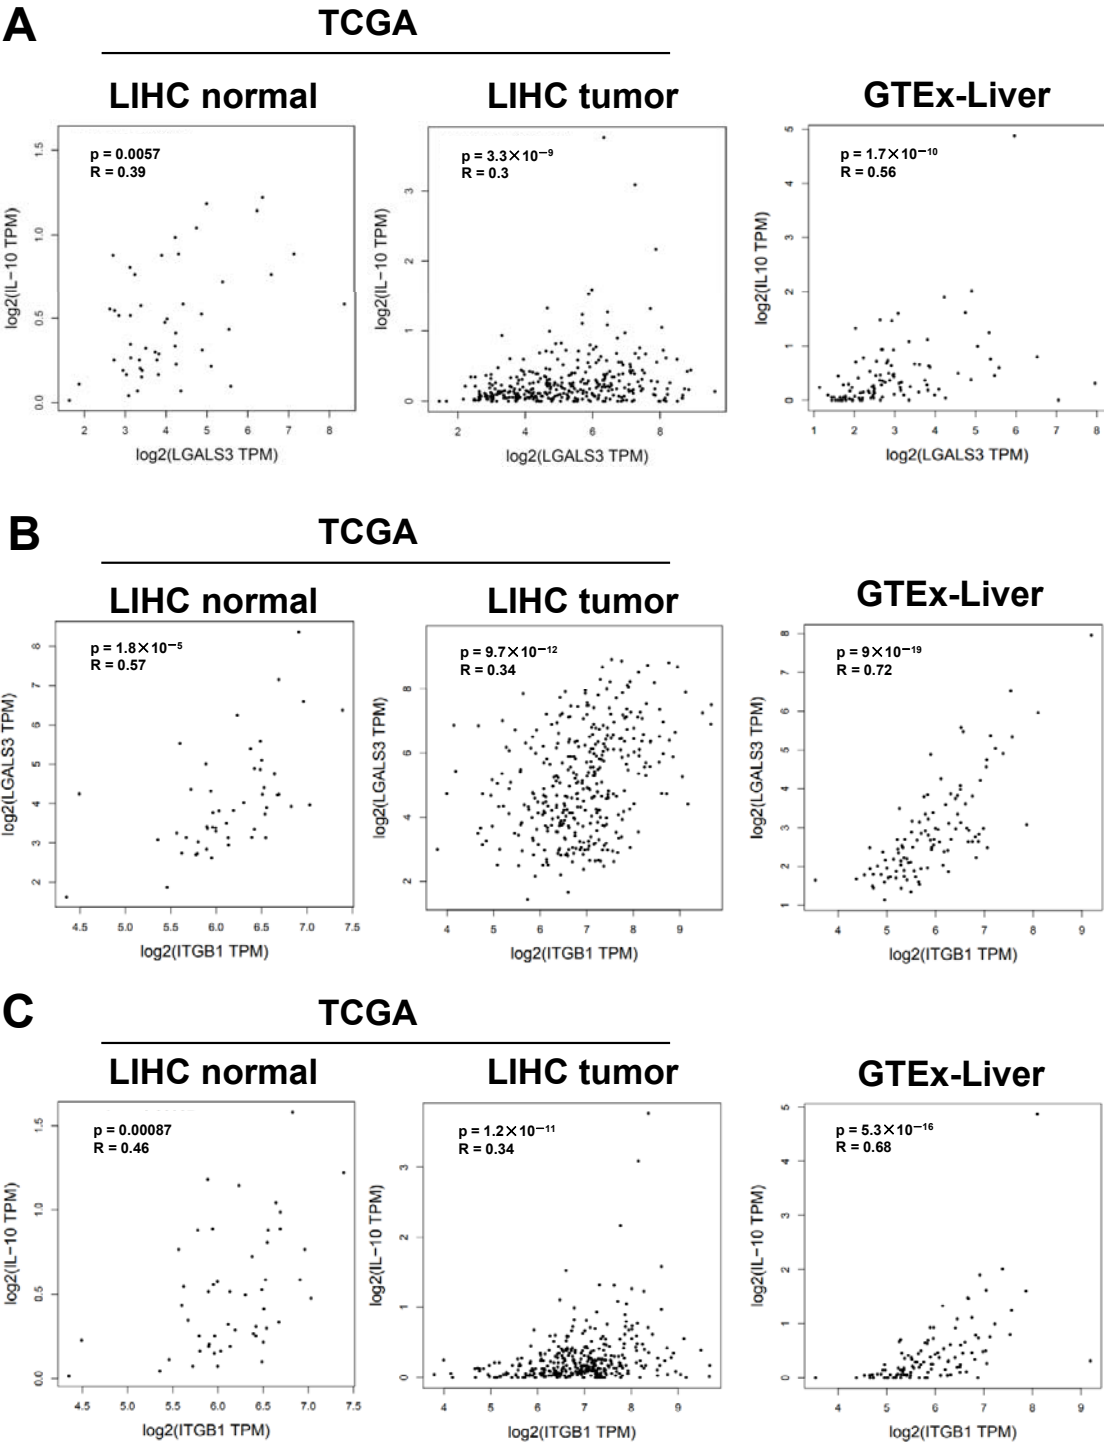

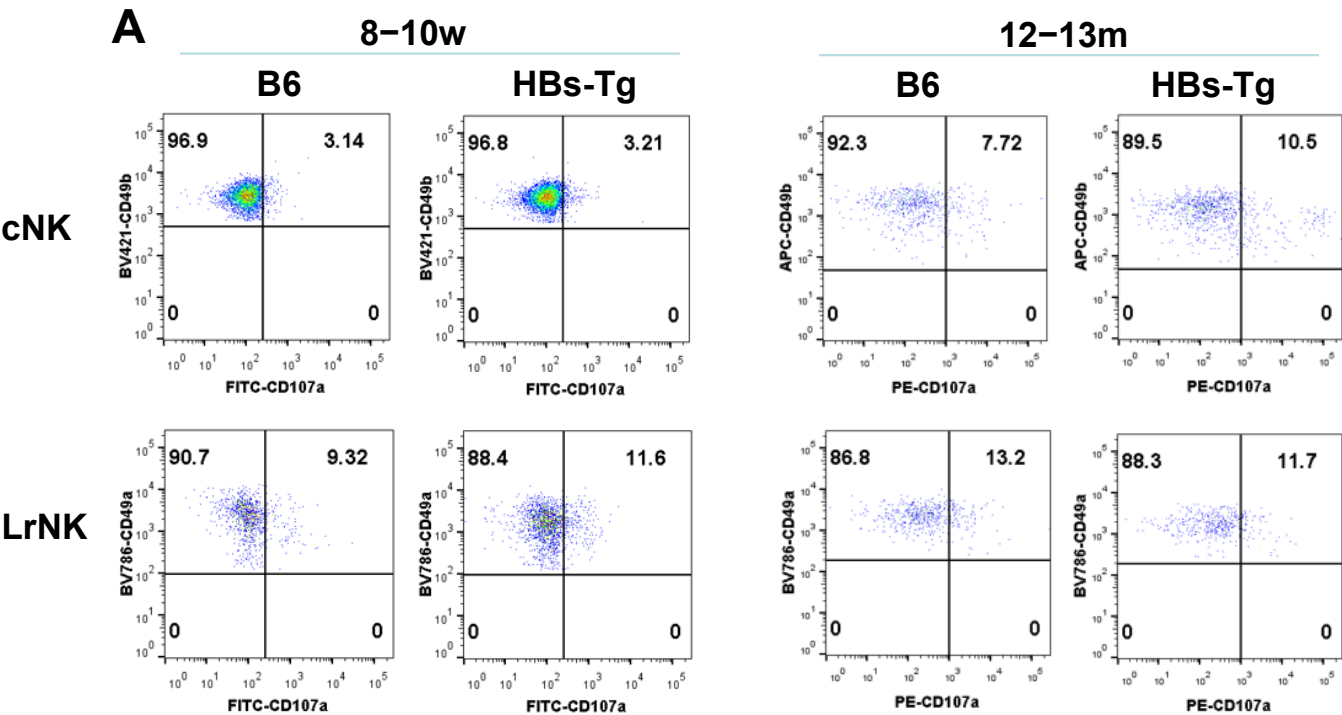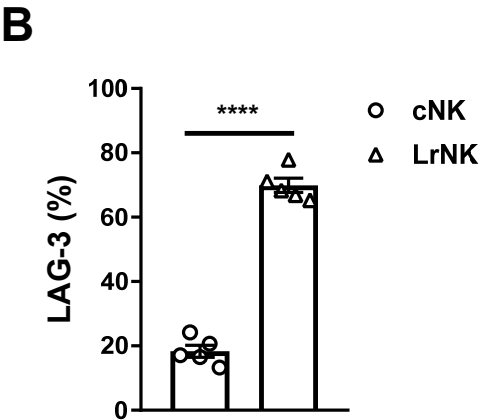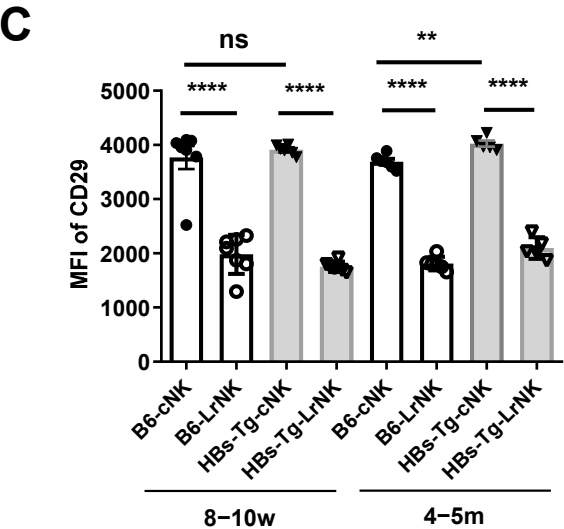

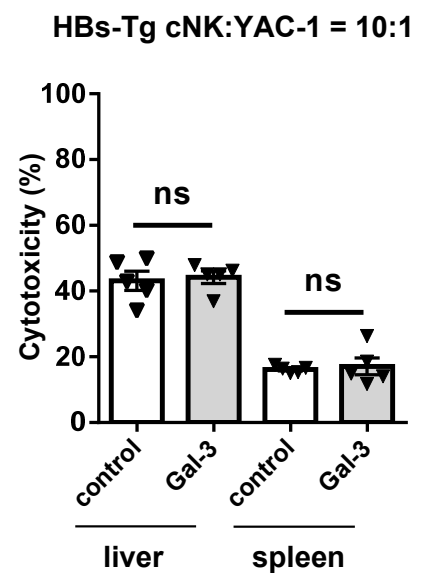

Supplement: s1 [file s1]
